# Supplementary material
Source: ML conference proceedings conference paper supplement (https://proceedings.mlr.press/v155/schiel21a.html)
Supplement: Supplementary file 1 [file schiel21a-supp.pdf]

## Supplementary Materials

### Algorithm 1 Implementation of the adaptive model

#### Recording and pre-processing

- Record resting data and training data
- Calibrate activity detection
- Initialize inducing points using k-Means and train sGPs w.r.t. their hyperparameters  $\sigma_n, \sigma_s, l$

#### Prediction steps

**Data:** WL EMG-feature of eight electrodes  
**Result:** Velocity vector  $\mathbf{v}^*$

- 1: **while** New data points arrive **do**
- 2:   **if** Activity detected **then**
- 3:     Computation of  $\mathbf{v}^*$
- 4:     Add sample  $\mathbf{x}^*$  to active batch ( $X^*$ )
- 5:     **if** size of  $X^* > k^*$  **then**
- 6:       Pass  $X^*$  to the *update branch*
- 7:   **else**
- 8:      $\mathbf{v}^* = \mathbf{0}$
- 9:     Add sample to resting batch ( $X^o$ )
- 10:    **if** size of  $X^o > k^o$  **then**
- 11:     Pass  $X^o$  to the *update branch*
- 12:    **if** No activity detected for  $t$  seconds **then**
- 13:     Reset active batch

#### Update rules

|    | $\delta$ | $\epsilon$ | $\bar{\sigma}^{*2}$          | $\bar{\mathbf{v}}^*$ | label       |
|----|----------|------------|------------------------------|----------------------|-------------|
| 1) | -        | +          | $-, (> \lambda_{\sigma 1})$  | $v_1 > v_2$          | class 1     |
| 2) | -        | -          | $++, (> \lambda_{\sigma 1})$ | $v_1 > v_2$          | class 1     |
| 3) | +        | o          | $o, (> \lambda_{\sigma 2})$  | $v_1 \gg v_2$        | class 1     |
| 4) | +        | o          | o                            | $v_1 \approx v_2$    | diag. label |
| 5) | (-)      |            | (++)                         |                      |             |
| 6) |          | (+)        | (+)                          |                      |             |

Here, - indicates small values, o medium values, + large values and ++ is defined as almost one.  $\lambda_{\sigma 1} := 0.2$  and  $\lambda_{\sigma 2} := 0.3$ . An inducing point is added to  $X_u$  at  $\tilde{\mathbf{x}}^*$  if all conditions in ( ) in one row are fulfilled.

#### Update steps

**Data:** Active batch or resting batch  
**Result:** Modified data structure of the sGPs

- 1: **if**  $X^*$  is passed **then**
- 2:   Calculate  $\tilde{\mathbf{x}}^*, \bar{\mathbf{v}}^*$  and  $\bar{\sigma}^{*2}$
- 3:   Calculate  $\delta$  and  $\epsilon$  using  $\tilde{\mathbf{x}}^*$
- 4:   Pull  $\mu_{1,j+1}^m$  towards  $\tilde{\mathbf{x}}^*$
- 5:   **if**  $\delta > 0.55$  **then**
- 6:     Pull  $\mu_{2,j+1}^m$  towards  $\tilde{\mathbf{x}}^*$
- 7:   **if** Update rule is fulfilled **then**
- 8:     Add rand subset of  $X^*$  to  $\mathcal{D}_d$  and remove rand subset of  $\mathcal{D}_d$  with equivalent label
- 9:   **if** Update rule to update  $X_u$  is fulfilled **then**
- 10:    Add  $\tilde{\mathbf{x}}^*$  to  $X_u$  of all sGPs
- 11:   **if** Number of updates  $> t_{u1}$  **or** update rule 5 or 6 **then**
- 12:     Optimize  $X_u$  of each sGP
- 13:   **if** Number of updates  $> t_{u2}$  **then**
- 14:     Recalculate  $\mu_c^0$  and  $\Sigma_c^0$  using  $\mathcal{D}_{sub}$
- 15: **else if**  $X^o$  is passed **then**
- 16:   Add rand subset of  $X^o$  to  $\mathcal{D}_d$  and remove rand subset of  $\mathcal{D}_d$
- 17: **if** Data structure of sGPs is modified **then**
- 18:   Recomputation of model structures within the library which are effected by changes of  $\mathcal{D}_d$  or  $X_u$
- 19:   Overwrite adapted model structures in *prediction branch*

#### Parameterization

| Parameter | Value | Parameter            | Value |
|-----------|-------|----------------------|-------|
| $k^*$     | 50    | $\alpha 1$           | 0.1   |
| $k^o$     | 1000  | $\alpha 2$           | 0.025 |
| $t$       | 0.1   | $\lambda_{\sigma 1}$ | 0.2   |
| $t_{u1}$  | 15    | $\lambda_{\sigma 2}$ | 0.3   |
| $t_{u2}$  | 20    |                      |       |

Table 1: Results of the Friedman test

| Friedman:     | Chi-Square Value<br>( $\chi_R^2$ )(2) | p-Value (p) | Effect Size ( $\omega$ ) |
|---------------|---------------------------------------|-------------|--------------------------|
| Position 1    | 33.917                                | < 0.0001    | 0.485                    |
| Position 2*   | 64.825                                | < 0.0001    | 0.671                    |
| Position 2**  | 104.039                               | < 0.0001    | 0.850                    |
| Main Axes     | 68.474                                | < 0.0001    | 0.563                    |
| Diagonal Axes | 123.293                               | < 0.0001    | 0.756                    |

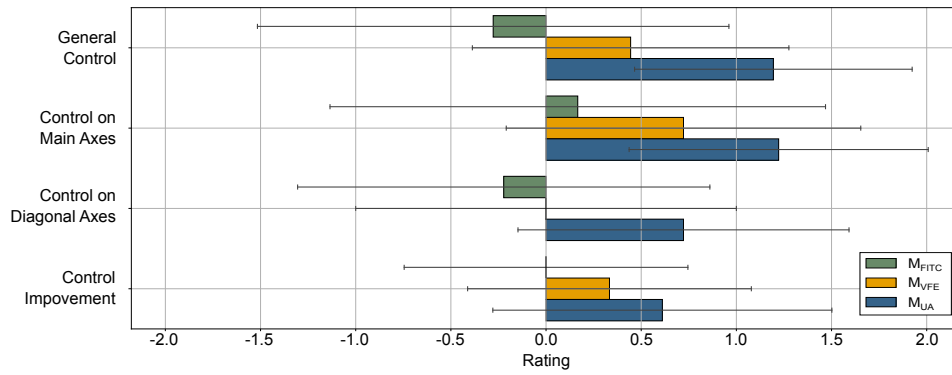

Figure 1: Results of the questionnaire on the satisfaction of the control with the range from -2.5 to +2.5. Subjects answered the questionnaire at the end of each test session.

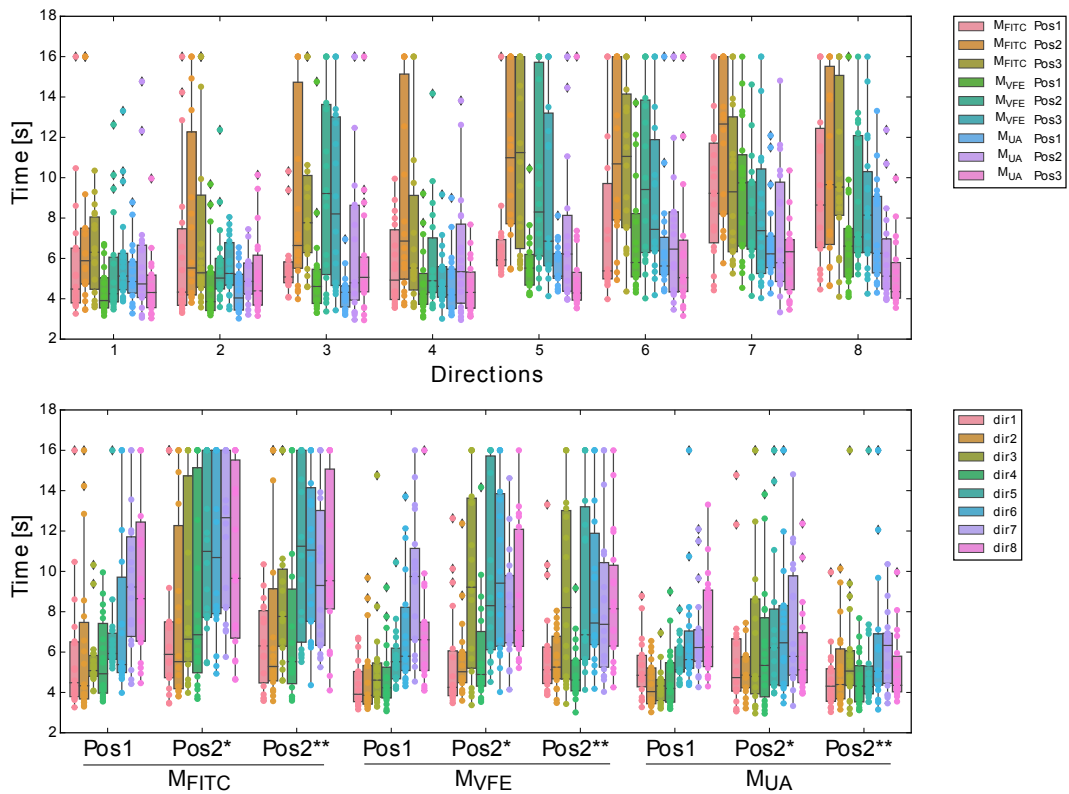

Figure 2: Results of the Fitts analysis; upper part: results for the different directions, direction 1-4 refer to the main axes and direction 5-8 to the diagonal axes; lower part: results for the different positions.

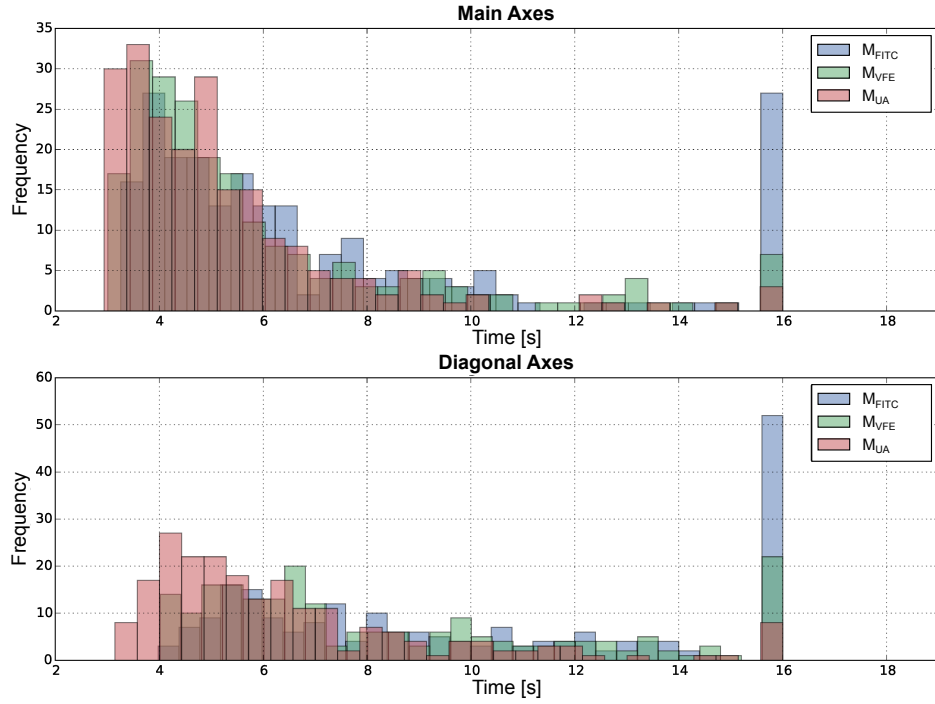

Figure 3: Distribution of time with respect to navigation along the main axes (top subplot) or diagonal axes (bottom subplot). Note that a time of 16s corresponds to failed trials.

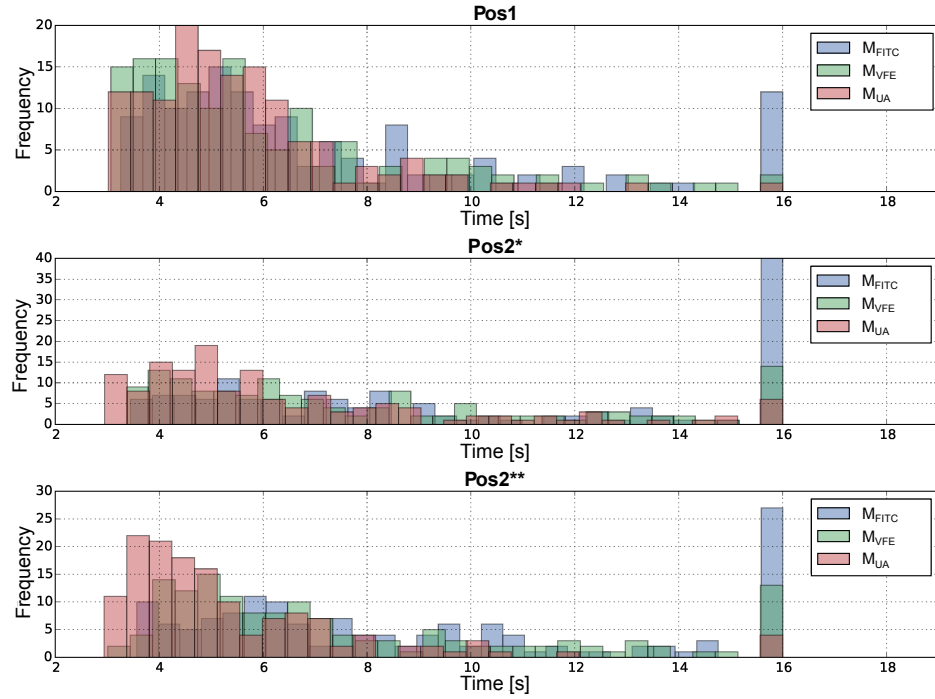

Figure 4: Distribution of time with respect to the different positions. Note that a time of 16s corresponds to failed trials.
